# Supplementary material for: A scoping review of cultural competence training gaps among healthcare professionals in low-and middle-income countries
Source: Springer Nature journal article supplement (doi:10.1186/s12913-025-13844-w), 2025-12-08
Supplement: MOESM1 [file 12913_2025_13844_MOESM1_ESM.docx]

**Appendix Materials**

**Appendix I – Search keywords development**

**Concept 1: cultural competence**

- Cultural competence
- Cultural competency
- Cultural sensitivity
- Cultural awareness
- Culturally appropriate care

**Concept 2: Training and education**

- Training
- Education
- Curriculum
- Professional development
- Workshop
- Capacity building

**Concept 3: Healthcare professionals**

- Healthcare professionals
- Health workers
- Health personnel
- Nurses
- Physicians
- Clinicians
- Midwives
- Allied health personnel
- Community health workers
- Health care providers
- Medical practitioners

**Concept 4: Low- and middle-income countries (LMICs)**

- Low- and middle-income countries
- Developing countries
- Global South
- Sub-Saharan Africa
- South Asia
- Latin America
- Resource-limited settings

**Appendix II – Search process**

Search strings - cultural competence training, healthcare professionals, low- and middle-income countries

(("cultural competency"[MeSH Terms] OR ("cultural"[All Fields] AND "competency"[All Fields]) OR "cultural competency"[All Fields] OR ("cultural"[All Fields] AND "competence"[All Fields]) OR "cultural competence"[All Fields]) AND ("education"[MeSH Subheading] OR "education"[All Fields] OR "training"[All Fields] OR "education"[MeSH Terms] OR "train"[All Fields] OR "train s"[All Fields] OR "trained"[All Fields] OR "training s"[All Fields] OR "trainings"[All Fields] OR "trains"[All Fields]) AND ("health personnel"[MeSH Terms] OR ("health"[All Fields] AND "personnel"[All Fields]) OR "health personnel"[All Fields] OR ("healthcare"[All Fields] AND "professionals"[All Fields]) OR "healthcare professionals"[All Fields]) AND ("developing countries"[MeSH Terms] OR ("developing"[All Fields] AND "countries"[All Fields]) OR "developing countries"[All Fields] OR ("low"[All Fields] AND "middle"[All Fields] AND "income"[All Fields] AND "countries"[All Fields]) OR "low and middle income countries"[All Fields]))

Search strings - cultural competence education, health workers, developing countries

(("cultural competency"[MeSH Terms] OR ("cultural"[All Fields] AND "competency"[All Fields]) OR "cultural competency"[All Fields] OR ("cultural"[All Fields] AND "competence"[All Fields]) OR "cultural competence"[All Fields]) AND ("educability"[All Fields] OR "educable"[All Fields] OR "educates"[All Fields] OR "education"[MeSH Subheading] OR "education"[All Fields] OR "educational status"[MeSH Terms] OR ("educational"[All Fields] AND "status"[All Fields]) OR "educational status"[All Fields] OR "education"[MeSH Terms] OR "education s"[All Fields] OR "educational"[All Fields] OR "educative"[All Fields] OR "educator"[All Fields] OR "educator s"[All Fields] OR "educators"[All Fields] OR "teaching"[MeSH Terms] OR "teaching"[All Fields] OR "educate"[All Fields] OR "educated"[All Fields] OR "educating"[All Fields] OR "educations"[All Fields]) AND ("health"[MeSH Terms] OR "health"[All Fields] OR "health s"[All Fields] OR "healthful"[All Fields] OR "healthfulness"[All Fields] OR "healths"[All Fields]) AND ("occupational groups"[MeSH Terms] OR ("occupational"[All Fields] AND "groups"[All Fields]) OR "occupational groups"[All Fields] OR "worker"[All Fields] OR "workers"[All Fields] OR "worker s"[All Fields]) AND ("developing countries"[MeSH Terms] OR ("developing"[All Fields] AND "countries"[All Fields]) OR "developing countries"[All Fields]))

Search strings - cultural competence training healthcare providers sub-Saharan Africa

(("cultural competency"[MeSH Terms] OR ("cultural"[All Fields] AND "competency"[All Fields]) OR "cultural competency"[All Fields] OR ("cultural"[All Fields] AND "competence"[All Fields]) OR "cultural competence"[All Fields]) AND ("education"[MeSH Subheading] OR "education"[All Fields] OR "training"[All Fields] OR "education"[MeSH Terms] OR "train"[All Fields] OR "train s"[All Fields] OR "trained"[All Fields] OR "training s"[All Fields] OR "trainings"[All Fields] OR "trains"[All Fields]) AND ("health personnel"[MeSH Terms] OR ("health"[All Fields] AND "personnel"[All Fields]) OR "health personnel"[All Fields] OR ("healthcare"[All Fields] AND "providers"[All Fields]) OR "healthcare providers"[All Fields]) AND ("africa south of the sahara"[MeSH Terms] OR ("africa"[All Fields] AND "south"[All Fields] AND "sahara"[All Fields]) OR "africa south of the sahara"[All Fields] OR ("sub"[All Fields] AND "saharan"[All Fields] AND "africa"[All Fields]) OR "sub saharan africa"[All Fields]))

Search strings - cultural competence education health care providers south asia

(("cultural competency"[MeSH Terms] OR ("cultural"[All Fields] AND "competency"[All Fields]) OR "cultural competency"[All Fields] OR ("cultural"[All Fields] AND "competence"[All Fields]) OR "cultural competence"[All Fields]) AND ("educability"[All Fields] OR "educable"[All Fields] OR "educates"[All Fields] OR "education"[MeSH Subheading] OR "education"[All Fields] OR "educational status"[MeSH Terms] OR ("educational"[All Fields] AND "status"[All Fields]) OR "educational status"[All Fields] OR "education"[MeSH Terms] OR "education s"[All Fields] OR "educational"[All Fields] OR "educative"[All Fields] OR "educator"[All Fields] OR "educator s"[All Fields] OR "educators"[All Fields] OR "teaching"[MeSH Terms] OR "teaching"[All Fields] OR "educate"[All Fields] OR "educated"[All Fields] OR "educating"[All Fields] OR "educations"[All Fields]) AND ("health personnel"[MeSH Terms] OR ("health"[All Fields] AND "personnel"[All Fields]) OR "health personnel"[All Fields] OR ("health"[All Fields] AND "care"[All Fields] AND "providers"[All Fields]) OR "health care providers"[All Fields]) AND ("asia, southern"[MeSH Terms] OR ("asia"[All Fields] AND "southern"[All Fields]) OR "southern asia"[All Fields] OR ("south"[All Fields] AND "asia"[All Fields]) OR "south asia"[All Fields]))

**Search strategy using Boolean operators**

(“Cultural competence” OR “cultural competency” OR “cultural sensitivity” OR “cultural awareness” OR “culturally appropriate care”)

AND

(“Training” OR “education” OR “curriculum” OR “professional development” OR “workshop” OR “capacity building”)

AND

(“Healthcare professionals” OR “health workers” OR “nurses” OR “physicians” OR “clinicians” OR “midwives” OR “allied health personnel” OR “community health workers” OR “health care providers” OR “Medical practitioners”)

AND

(“Low- and middle-income countries” OR “LMICs” OR “developing countries” OR “Global South” OR “sub-Saharan Africa” OR “South Asia” OR “Latin America” OR “resource limited settings”
